# Supplementary material
Source: publisher site journal article supplement (https://www.dovepress.com/article/420258)
Supplement: Supplementary file 1 [file get_supplementary_file.php]

**Legends to the figures:**

**Supplement Figure 1. Scheme of the Testosterone-Induced BPH in Rats.**

All animal experiments were conducted in accordance with the European Union regulations and approved by the Animal Experimentation Ethics Committee of Southern Medical University (SMU), Guangzhou, China. Male Sprague Dawley rats (180-220g), aged six weeks, were obtained from the Laboratory Animal Center of SMU and kept under controlled environmental conditions. After a period of acclimation, rats were castrated and then received subcutaneous injections of dihydrotestosterone (3mg/kg) for four weeks to induce BPH. The rats also received oral administration of vehicle (distilled water) daily, starting 72 h after castration. The rats were randomly assigned to different treatment groups (Supplement Fig.1).

Harvest for the following experiments

DAY 3

DAY 33

Subcutaneous injection of dihydrotestosterone (3mg/kg)

Acclimation

DAY 0

Castration

Injections and oral treatments once daily

**Supplement Figure 1. Scheme of the Testosterone-Induced BPH in Rats.**
